# Supplementary material for: Time-Restricted Feeding Improves Body Weight Gain, Lipid Profiles, and Atherogenic Indices in Cafeteria-Diet-Fed Rats: Role of Browning of Inguinal White Adipose Tissue
Source: PubMed Central journal article supplement (PMC7469029; doi:10.3390/nu12082185), 2020-07-23
Supplement: nutrients-12-02185-s001.pdf [file nutrients-12-02185-s001.pdf]

**Table S1.** Normal chow and cafeteria food items compositions as given by the product manufacturers.

| <b>Values are Per 1g of Food Item</b>     | Total (kcal) | Total Fat (g) | Saturated Fat (g) | Cholesterol (mg) | Protein (g) | Total Carb (g) | Sugars (g) | Dietary Fiber (g) | Sodium (mg) |
|-------------------------------------------|--------------|---------------|-------------------|------------------|-------------|----------------|------------|-------------------|-------------|
| Normal chow                               | 3.10         | 0.06          | 0.00              | 0.00             | 0.19        | 0.44           | 0.04       | 0.03              |             |
| Cereals Lion Caramel Chocolat (Nestle)    | 4.06         | 0.07          | 0.03              | 0.00             | 0.08        | 0.76           | 0.29       | 0.05              | 2.00        |
| Nesquick Cereals (Nestle)                 | 3.96         | 0.02          | 0.01              | 0.00             | 0.08        | 0.76           | 0.25       | 0.09              | 4.40        |
| Chocolate Chip Cookies (Bimo)             | 5.40         | 0.25          | 0.12              | 0.00             | 0.06        | 0.61           | 0.31       | 0.02              | 2.97        |
| Cream Filled cookies (Dream)              | 4.92         | 0.24          | 0.14              | 0.00             | 0.05        | 0.65           | 0.27       | 0.03              | 1.46        |
| Bar Peanuts Chocolat (Maxon)              | 5.65         | 0.37          | 0.14              | 0.15             | 0.05        | 0.55           | 0.40       | 0.00              | 1.32        |
| Chocolat Filled with Caramel Cream (Bimo) | 4.73         | 0.22          | 0.14              | 0.00             | 0.08        | 0.62           | 0.53       | 0.01              | 2.00        |
| Mallow Pie (Alpella)                      | 4.48         | 0.18          | 0.11              | 0.00             | 0.05        | 0.67           | 0.45       | 0.03              | 2.61        |
| Mini Muffin (Dulcesol)                    | 4.72         | 0.28          | 0.03              | 0.76             | 0.05        | 0.50           | 0.35       | 0.01              | 2.90        |
| Snack' Choc Caramel (Alpella)             | 4.56         | 0.17          | 0.13              | 0.00             | 0.04        | 0.71           | 0.60       | 0.01              | 1.67        |
| Truffle Snack (Dulcesol)                  | 5.31         | 0.26          | 0.13              | 0.00             | 0.04        | 0.63           | 0.44       | 0.02              | 1.00        |
| Crackers Cheese Flavored (Tuc)            | 4.85         | 0.23          | 0.10              | 0.06             | 0.08        | 0.61           | 0.05       | 0.02              | 10.60       |
| Peanuts Corn Chips (Mr. Chips)            | 5.00         | 0.26          | 0.04              | 0.00             | 0.13        | 0.56           | 0.02       | 0.04              | 7.56        |
| Potato Crisps (Mister)                    | 5.10         | 0.29          | 0.15              | 0.00             | 0.06        | 0.54           | 0.03       | 0.05              | 7.81        |
| Cream Filled Wafers (Bimo)                | 5.24         | 0.28          | 0.20              | 0.10             | 0.06        | 0.60           | 0.31       | 0.06              | 0.58        |
| Beef Salami (Bellat)                      | 3.70         | 0.30          | 0.09              | 0.90             | 0.22        | 0.02           | 0.00       | 0.00              | 12.49       |
| Pâté Pizza Flavored (Bellat)              | 3.39         | 0.28          | 0.10              | 2.48             | 0.15        | 0.03           | 0.00       | 0.00              | 6.90        |
| Chicken Liver Pâté (Bellat)               | 2.13         | 0.14          | 0.06              | 3.89             | 0.14        | 0.06           | 0.00       | 0.00              | 3.80        |
| Beef Corned (Bellat)                      | 2.14         | 1.34          | 0.05              | 0.80             | 0.23        | 0.00           | 0.00       | 0.00              | 7.85        |
| Cheese Cheddar (Chebli)                   | 4.02         | 0.33          | 0.21              | 1.05             | 0.25        | 0.01           | 0.00       | 0.00              | 6.22        |
